# Supplementary material for: Relationship of Glycated Hemoglobin A1c with All-Cause and Cardiovascular Mortality among Patients with Hypertension
Source: J Clin Med. 2023 Mar 30;12(7):2615. doi: 10.3390/jcm12072615 (PMC10095266; doi:10.3390/jcm12072615)
Supplement: Supplementary file 1 [file jcm-12-02615-s001.zip › jcm-2170186-supplementary.pdf]

**Table S1.** Data for Figure 4 (Subgroup analysis)

|                        | All-cause mortality, HR (95% CI) , <i>p</i> |                           |                            | Cardiovascular mortality, HR (95% CI), <i>p</i> |                           |                            |
|------------------------|---------------------------------------------|---------------------------|----------------------------|-------------------------------------------------|---------------------------|----------------------------|
| Threshold value, %     | N                                           | HbA1c ≤ 5.3               | HbA1c > 5.3                | N                                               | HbA1c ≤ 5.7               | HbA1c > 5.7                |
| Age                    |                                             |                           |                            |                                                 |                           |                            |
| <65                    | 8243                                        | 0.67 (0.41, 1.09) ,0.1067 | 1.17 (1.12, 1.22) ,<0.0001 | 7469                                            | 0.96 (0.51, 1.82), 0.9118 | 1.20 (1.11, 1.30) ,<0.0001 |
| ≥65                    | 5265                                        | 0.88 (0.61, 1.29) ,0.5181 | 1.07 (1.02, 1.11), 0.0045  | 3402                                            | 0.97 (0.68, 1.38), 0.8707 | 1.14 (1.05, 1.24) ,0.0015  |
| Gender                 |                                             |                           |                            |                                                 |                           |                            |
| Male                   | 6721                                        | 0.91 (0.60, 1.39) ,0.6725 | 1.14 (1.09, 1.19) ,<0.0001 | 5316                                            | 0.97 (0.64, 1.47) ,0.8779 | 1.26 (1.17, 1.36) ,<0.0001 |
| Female                 | 6787                                        | 0.46 (0.30, 0.69) ,0.0002 | 1.16 (1.11, 1.21), <0.0001 | 5555                                            | 0.58 (0.36, 0.93) ,0.0246 | 1.20 (1.09, 1.31) ,0.0002  |
| Race                   |                                             |                           |                            |                                                 |                           |                            |
| Mexican American       | 2161                                        | 0.49 (0.17, 1.36), 0.1706 | 1.16 (1.09, 1.24), <0.0001 | 1758                                            | 0.57 (0.18, 1.84) ,0.3456 | 1.26 (1.11, 1.42) ,0.0002  |
| Other Hispanic         | 948                                         | NA                        | 1.32 (1.15, 1.52), <0.0001 | 817                                             | NA                        | 1.38 (1.03, 1.83) ,0.0290  |
| Non-Hispanic White     | 6259                                        | 0.77 (0.53, 1.13) ,0.1814 | 1.16 (1.10, 1.23) ,<0.0001 | 4782                                            | 0.73 (0.50, 1.07) ,0.1085 | 1.30 (1.15, 1.47), <0.0001 |
| Non-Hispanic Black     | 3337                                        | 0.63 (0.33, 1.20) ,0.1620 | 1.12 (1.06, 1.18), <0.0001 | 2786                                            | 0.81 (0.42, 1.55) ,0.5166 | 1.18 (1.08, 1.29) ,0.0002  |
| Asian and Other Race   | 803                                         | NA                        | 1.08 (0.90, 1.29) ,0.4150  | 728                                             | NA                        | 1.76 (1.29, 2.39) ,0.0003  |
| Education              |                                             |                           |                            |                                                 |                           |                            |
| Lower than high school | 4374                                        | 0.70 (0.43, 1.15) ,0.1616 | 1.12 (1.08, 1.17), <0.0001 | 3271                                            | 1.03 (0.62, 1.70) ,0.9075 | 1.19 (1.11, 1.28) ,<0.0001 |
| High school            | 3329                                        | 0.34 (0.18, 0.63) ,0.0007 | 1.17 (1.09, 1.25), <0.0001 | 2660                                            | 0.53 (0.28, 1.00) ,0.0487 | 1.19 (1.05, 1.36) ,0.0091  |
| More than high school  | 5805                                        | 0.72 (0.45, 1.17) ,0.1867 | 1.20 (1.13, 1.28), <0.0001 | 4940                                            | 0.77 (0.45, 1.30) ,0.3291 | 1.36 (1.19, 1.56) ,<0.0001 |
| Body mass index        |                                             |                           |                            |                                                 |                           |                            |
| <25                    | 2722                                        | 0.73 (0.43, 1.26) ,0.2641 | 1.12 (1.04, 1.20) ,0.0025  | 2019                                            | 0.64 (0.37, 1.12) ,0.1184 | 1.21 (1.06, 1.38) ,0.0055  |
| ≥25                    | 10786                                       | 0.67 (0.47, 0.95) ,0.0235 | 1.15 (1.11, 1.19) ,<0.0001 | 8852                                            | 0.85 (0.58, 1.24) ,0.4049 | 1.21 (1.14, 1.29) ,<0.0001 |
| Smoking                |                                             |                           |                            |                                                 |                           |                            |
| Never Smoker           | 6813                                        | 0.55 (0.35, 0.88) ,0.0116 | 1.18 (1.13, 1.24) ,<0.0001 | 5735                                            | 0.59 (0.38, 0.94) ,0.0259 | 1.27 (1.16, 1.38), <0.0001 |
| Current Smoker         | 2594                                        | 0.62 (0.32, 1.20) ,0.1578 | 1.14 (1.06, 1.22) ,0.0004  | 2079                                            | 1.06 (0.51, 2.17) ,0.8842 | 1.24 (1.11, 1.40) ,0.0002  |
| Ex-Smoker              | 4101                                        | 0.80 (0.49, 1.31) ,0.3760 | 1.13 (1.07, 1.19) ,<0.0001 | 3057                                            | 0.93 (0.55, 1.57) ,0.7777 | 1.21 (1.10, 1.34) ,0.0002  |

|                                    |       |                           |                            |       |                           |                            |
|------------------------------------|-------|---------------------------|----------------------------|-------|---------------------------|----------------------------|
| <b>Diabetes diagnosis</b>          |       |                           |                            |       |                           |                            |
| No pre-diabetes                    | 5339  | 0.62 (0.44, 0.86), 0.0048 | 1.01 (0.36, 2.79), 0.9921  | 4443  | 0.59 (0.39, 0.88), 0.0096 | NA                         |
| Pre-diabetes                       | 3606  | NA                        | 1.11 (1.07, 1.15), <0.0001 | 2701  | NA                        | 1.19 (1.12, 1.26), <0.0001 |
| Diabetes                           | 4563  | 0.92 (0.44, 1.92), 0.8174 | 0.95 (0.72, 1.24), 0.6902  | 3727  | 0.77 (0.44, 1.34), 0.3496 | 0.72 (0.29, 1.78), 0.4793  |
| <b>Fasting blood-glucose</b>       |       |                           |                            |       |                           |                            |
| <5.6                               | 8046  | 0.64 (0.46, 0.89), 0.0081 | 1.08 (0.95, 1.24), 0.2232  | 6618  | 0.72 (0.50, 1.03), 0.0683 | 1.29 (1.02, 1.62), 0.0355  |
| 5.6-6.9                            | 3286  | 0.89 (0.44, 1.83), 0.7587 | 1.05 (0.93, 1.20), 0.4153  | 2614  | 1.11 (0.57, 2.15), 0.7565 | 1.11 (0.85, 1.44), 0.4477  |
| ≥7                                 | 2176  | NA                        | 1.10 (1.06, 1.15), <0.0001 | 1639  | NA                        | 1.14 (1.06, 1.23), 0.0003  |
| <b>Coronary heart disease</b>      |       |                           |                            |       |                           |                            |
| NO                                 | 11986 | 0.69 (0.51, 0.95), 0.0218 | 1.13 (1.09, 1.17), <0.0001 | 9835  | 0.78 (0.55, 1.10), 0.1581 | 1.18 (1.10, 1.27), <0.0001 |
| YES                                | 1522  | 0.64 (0.27, 1.55), 0.3228 | 1.19 (1.11, 1.27), <0.0001 | 1036  | 0.89 (0.43, 1.83), 0.7464 | 1.33 (1.21, 1.48), <0.0001 |
| <b>Acute myocardial infarction</b> |       |                           |                            |       |                           |                            |
| NO                                 | 12481 | 0.70 (0.52, 0.95), 0.0207 | 1.14 (1.10, 1.18), <0.0001 | 10183 | 0.78 (0.56, 1.08), 0.1368 | 1.20 (1.13, 1.29), <0.0001 |
| YES                                | 1027  | 0.52 (0.16, 1.68), 0.2773 | 1.15 (1.07, 1.25), 0.0004  | 688   | 0.98 (0.40, 2.37), 0.9586 | 1.30 (1.15, 1.46), <0.0001 |
| <b>Chronic heart failure</b>       |       |                           |                            |       |                           |                            |
| NO                                 | 12753 | 0.69 (0.50, 0.95), 0.0219 | 1.14 (1.10, 1.18), <0.0001 | 10384 | 0.91 (0.65, 1.27), 0.5669 | 1.24 (1.16, 1.31), <0.0001 |
| YES                                | 755   | 0.70 (0.29, 1.71), 0.4355 | 1.15 (1.06, 1.25), 0.0013  | 487   | 0.60 (0.30, 1.20), 0.1471 | 1.20 (1.04, 1.39), 0.0131  |
| <b>Stroke</b>                      |       |                           |                            |       |                           |                            |
| NO                                 | 12679 | 0.69 (0.51, 0.94), 0.0201 | 1.15 (1.11, 1.19), <0.0001 | 10344 | 0.87 (0.62, 1.22), 0.4268 | 1.21 (1.14, 1.29), <0.0001 |
| YES                                | 829   | 0.43 (0.16, 1.14), 0.0886 | 1.11 (1.01, 1.21), 0.0255  | 527   | 0.38 (0.16, 0.91), 0.0296 | 1.33 (1.12, 1.58), 0.0011  |

HbA1c, glycated hemoglobin A1c; N, number; HR, hazard ratio; CI, confidence interval; NA, not available because of the small sample size. Ex-Smoker, those who previously smoked but had currently stopped; When analyzing a subgroup variable, age, gender, race, education, body mass index, smoking, coronary heart disease, acute myocardial infarction, chronic heart failure, stroke, creatinine, hemoglobin, triglycerides, total cholesterol, high-density lipoprotein cholesterol, antihypertensive drugs, hypoglycemic agents, aspirin, clopidogrel, and statin were all adjusted except the variable itself, and diabetes was not adjusted in cardiovascular mortality subgroup.

**Figure S1**

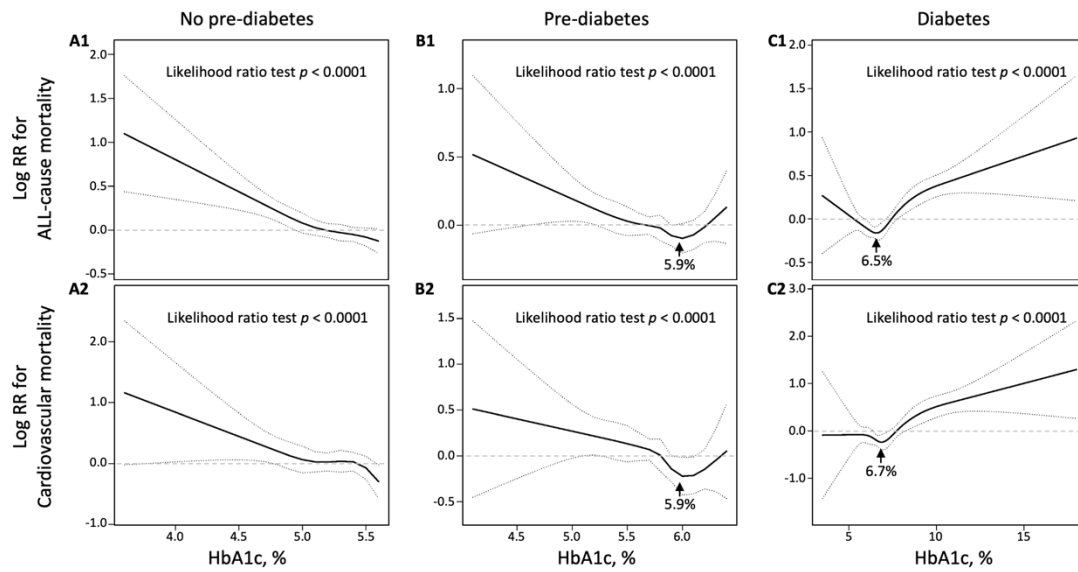

**Figure S1.** Restricted cubic spine models of HbA1c with all-cause and cardiovascular mortality in hypertension patients with no pre-diabetes (A1&A2), pre-diabetes (B1&B2) and diabetes (C1&C2). HbA1c, glycated hemoglobin A1c. Restricted cubic spine models were adjusted for adjusted for age, gender, race, education, body mass index, smoking, coronary heart disease, acute myocardial infarction, chronic heart failure, stroke, creatinine, hemoglobin, triglycerides, total cholesterol, high-density lipoprotein cholesterol, antihypertensive drugs, hypoglycemic agents, aspirin, clopidogrel, and statin.
